# Supplementary material for: Probiotics for Mild Cognitive Impairment and Alzheimer’s Disease: A Systematic Review and Meta-Analysis
Source: MDPI journal article supplement (doi:10.3390/foods10071672), 2021-07-20
Supplement: s1 [file s1]

## Supplementary S1 Details of searching strategy and screening process

### PubMed

**Search strategy :** (((("Alzheimer Disease"[Mesh]) OR (((((((Alzheimer[All Fields]) OR (Alzheimer's[All Fields])) OR (Alzheimer's Disease[All Fields])) OR (Alzheimer Type Dementia[All Fields])) OR (Alzheimer Dementia[All Fields])) OR (Late Onset Alzheimer Disease[All Fields])) OR (Familial Alzheimer Disease[All Fields])) OR (Early Onset Alzheimer Disease[All Fields])) OR (((((Cognitive Dysfunction[MeSH Terms]) OR (Cognitive Impairment[All Fields])) OR (Mild Cognitive Impairment[All Fields])) OR (Mild Cognitive Impairments[All Fields])) OR (Mild Neurocognitive Disorder[All Fields])) AND (((((((((((Probiotics[MeSH Terms]) OR (probio\*[All Fields])) OR (lactobacill\*[All Fields])) OR (bifidobacter\*[All Fields])) ) OR (lactococcus\*[All Fields])) OR (Saccharomyce\*[All Fields])) OR (pediococcus[All Fields])) OR (streptococcus[All Fields])) OR (Lactic Acid Bacteria[All Fields])) OR (((((((Prebiotics[MeSH Terms]) OR (Prebiotic[All Fields])) OR (inulin[All Fields])) OR (fructooligosaccharide[All Fields])) OR (fructo-oligosaccharide[All Fields])) OR (oligofructose[All Fields])) OR (lactulose[All Fields])) OR (Synbiotics[MeSH Terms])) OR (Synbiotic[All Fields])))) AND (((randomized controlled trial[Publication Type]) OR (randomized[Title/Abstract])) OR (placebo[Title/Abstract]))

**Search results: 67 items**

### Web of Science

#### Search strategy:

| Set | Results | Search history                                                                                                                                                                                                                                            |
|-----|---------|-----------------------------------------------------------------------------------------------------------------------------------------------------------------------------------------------------------------------------------------------------------|
| # 4 | 101     | #3 AND #2 AND #1                                                                                                                                                                                                                                          |
| # 3 | 2659806 | TS = (randomized controlled trial OR random OR placebo)                                                                                                                                                                                                   |
| # 2 | 413803  | TS = (probio* OR lactobacill* OR bifidobacter* OR lactococcus* OR Saccharomyce* OR pediococcus OR streptococcus OR Lactic Acid Bacteria OR prebio* OR inulin OR fructooligosaccharide OR fructo-oligosaccharide OR oligofructose OR lactulose OR synbio*) |
| # 1 | 365409  | TS = (Alzheimer* OR Mild Cognitive Impairment OR Cognitive Dysfunction)                                                                                                                                                                                   |

**Search results: 101 items**

### Cochrane library

#### Search strategy:

| ID | Search                                                                                                                                                                                                                                                                                  | Hits  |
|----|-----------------------------------------------------------------------------------------------------------------------------------------------------------------------------------------------------------------------------------------------------------------------------------------|-------|
| #1 | (Alzheimer):ti,ab,kw OR (Alzheimer's):ti,ab,kw OR (Alzheimer's Disease):ti,ab,kw OR (Alzheimer Type Dementia):ti,ab,kw OR (Alzheimer Dementia):ti,ab,kw OR (Late Onset Alzheimer Disease):ti,ab,kw OR (Familial Alzheimer Disease):ti,ab,kw OR (Early Onset Alzheimer Disease):ti,ab,kw | 11366 |
| #2 | MeSH descriptor: [Alzheimer Disease] explode all trees                                                                                                                                                                                                                                  | 3473  |
| #3 | MeSH descriptor: [Cognitive Dysfunction] explode all trees                                                                                                                                                                                                                              | 1675  |
| #4 | (Cognitive Impairment):ti,ab,kw OR (Mild Cognitive Impairment):ti,ab,kw OR (Mild Cognitive Impairments):ti,ab,kw OR (Mild Neurocognitive Disorder):ti,ab,kw                                                                                                                             | 12113 |
| #5 | #2 OR #1 OR #3 OR #4                                                                                                                                                                                                                                                                    | 21862 |

|     |                                                                                                                                                                                                                          |       |
|-----|--------------------------------------------------------------------------------------------------------------------------------------------------------------------------------------------------------------------------|-------|
| #6  | MeSH descriptor: [Probiotics] explode all trees                                                                                                                                                                          | 2080  |
| #7  | (probio*):ti,ab,kw OR (lactobacill*):ti,ab,kw OR (bifidobacter*):ti,ab,kw OR (lactococcus*):ti,ab,kw OR (Saccharomyce):ti,ab,kw OR (pediococcus):ti,ab,kw OR (streptococcus):ti,ab,kw OR (Lactic Acid Bacteria):ti,ab,kw | 13957 |
| #8  | MeSH descriptor: [Prebiotics] explode all trees                                                                                                                                                                          | 293   |
| #9  | (Prebiotic):ti,ab,kw OR (inulin):ti,ab,kw OR (fructooligosaccharide):ti,ab,kw OR (fructo-oligosaccharide):ti,ab,kw OR (oligofructose):ti,ab,kw OR (lactulose):ti,ab,kw                                                   | 3581  |
| #10 | MeSH descriptor: [Synbiotics] explode all trees                                                                                                                                                                          | 154   |
| #11 | (Synbiotic):ti,ab,kw                                                                                                                                                                                                     | 614   |
| #12 | #6 OR #7 OR #8 OR #9 OR #10 OR #11                                                                                                                                                                                       | 16609 |
| #13 | #5 AND #12                                                                                                                                                                                                               | 71    |

**Search results: 71 items**

### *Embase*

#### **Search strategy:**

| No. | Query                                                                                                                                                                                                                                                         | Results |
|-----|---------------------------------------------------------------------------------------------------------------------------------------------------------------------------------------------------------------------------------------------------------------|---------|
| #10 | #4 AND #8 AND #9                                                                                                                                                                                                                                              | 55      |
| #9  | 'randomized controlled trial':ab,ti OR 'randomized':ab,ti OR 'placebo':ab,ti                                                                                                                                                                                  | 965540  |
| #8  | #5 OR #6 OR #7                                                                                                                                                                                                                                                | 187521  |
| #7  | 'synbiotic*':ab,ti                                                                                                                                                                                                                                            | 1975    |
| #6  | 'prebio*':ab,ti OR 'inulin':ab,ti OR 'fructooligosaccharide':ab,ti OR 'fructo-oligosaccharide':ab,ti OR 'oligofructose':ab,ti OR 'lactulose':ab,ti                                                                                                            | 26754   |
| #5  | 'probio*':ab,ti OR 'lactobacill*':ab,ti OR 'bifidobacter*':ab,ti OR 'lactococcus*':ab,ti OR 'saccharomyce':ab,ti OR 'pediococcus':ab,ti OR 'streptococcus':ab,ti OR 'lactic acid bacteria':ab,ti                                                              | 166799  |
| #4  | #1 OR #2 OR #3                                                                                                                                                                                                                                                | 334429  |
| #3  | 'mild cognitive impairment*':ab,ti OR 'cognitive dysfunction':ab,ti OR 'cognitive impairment':ab,ti OR 'mild neurocognitive disorder':ab,ti                                                                                                                   | 114683  |
| #2  | 'alzheimer':ab,ti OR 'alzheimer*':ab,ti OR 'alzheimer* disease':ab,ti OR 'alzheimer type dementia':ab,ti OR 'alzheimer dementia':ab,ti OR 'late onset alzheimer disease':ab,ti OR 'familial alzheimer disease':ab,ti OR 'early onset alzheimer disease':ab,ti | 210312  |
| #1  | 'alzheimer disease'/exp OR 'alzheimer disease'                                                                                                                                                                                                                | 215622  |

**Search results: 55 items**

### *Clinical Trials*

#### **Search strategy:**

Condition or disease: Alzheimer disease or mild cognitive impairment

Intervention/treatment: probiotics or prebiotics or synbiotics

**Search results: 2 items**

|                |                                                                                                 |                                                                       |
|----------------|-------------------------------------------------------------------------------------------------|-----------------------------------------------------------------------|
| Title:         | Study1: Intervention of Intestinal Microorganism in Mild Cognitive Impairment                   | Study2: Can Lifestyle Changes Reverse Early-Stage Alzheimer's Disease |
| Status:        | Recruiting                                                                                      | Recruiting                                                            |
| Study Results: | No Results Available                                                                            | No Results Available                                                  |
| Conditions:    | Gut Microbiota<br>Mild Cognitive Impairment<br>Dementia, Alzheimer Type                         | Alzheimer Disease                                                     |
| Interventions: | Dietary Supplement: Probiotic supplemented intervention<br>Dietary Supplement: Placebo          | Behavioral: Lifestyle medicine                                        |
| Locations:     | Department of Neurology, Xuanwu Hospital of Capital Medical University, Beijing, Beijing, China | Dean Ornish, M.D., Sausalito, California, United States               |
